# Supplementary material
Source: Springer Nature journal article supplement (https://www.springermedizin.de/resource/supplementary/13058_2005_1321_MOESM1_ESM.pdf/9698848)

Before Tamoxifen exposure

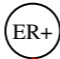

ER-

$(1-Z) \times (1-RR)$

$Z$

$(1-RR)$

After Tamoxifen exposure

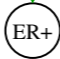

ER-

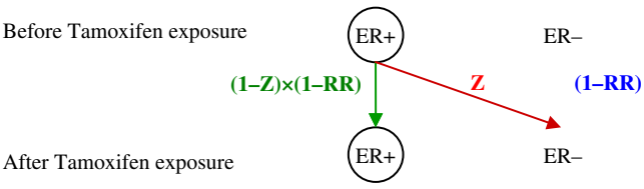

Supplement: MOESM1 [file 9698848]
